# Supplementary material
Source: ML conference proceedings conference paper supplement (https://openreview.net/forum?id=lpmQaseCZW)
Supplement: supplementary_material [file attachment]

# Supplementary Materials: CompGS: Efficient 3D Scene Representation via Compressed Gaussian Splatting

Anonymous Authors

## 1 PER-SCENE RESULTS ON EVALUATION DATASETS

We provide per-scene evaluation results between our method and comparison methods [2, 4, 6–8] on the three used datasets. We focus on scene-by-scene comparisons to evaluate the effectiveness of the proposed CompGS in various scenarios.

Specifically, Table 1 illustrates the comparison results on two scenes, namely *Train* and *Truck*. It can be observed that our method attains 29.93× compression ratio on the *Train* scene, and achieves more than 37.59% size reduction as compared to the most advanced compression method [8]. Similarly, the proposed CompGS demonstrates superior compression performance on the *Truck* scene, attaining a compression ratio of 57.62× while maintaining comparable rendering quality.

Additionally, Table 2 presents the results on the Deep Blending dataset [3]. For the *DrJohnson* scene, our approach successfully reduces the data size from 782.10 MB to 8.21 MB without compromising visual quality. Meanwhile, our method achieves significant compression advancements on the *Playroom* scene, exhibiting a compression ratio ranging from 76.91× to 108.67× and decreasing the data size to under 8 MB from the original 549.88 MB.

Moreover, Table 3 depicts the evaluation results on the Mip-NeRF 360 dataset [1]. Our framework achieves a remarkable average compression ratio of up to 89.35×. Specifically, the proposed CompGS exhibits substantial bitrate reductions for scenes such as *Bicycle* and *Garden*, lowering the size from 1431.12 MB and 1383.79 MB to 21.74 MB and 28.66 MB, respectively, while preserving rendering quality. It is noteworthy that for the *Stump* scene, our proposed CompGS demonstrates exceptional performance with a compression ratio of 175.20×. This might be attributed to the inherent local similarities within this particular scene. For the scenes that have smaller sizes such as the *Room*, *Counter*, and *Bonsai* scenes with sizes ranging from 285.04 MB to 366.62 MB, our method still achieves a compression ratio of 41.43×, 29.66×, and 25.25×, respectively.

The per-scene evaluation demonstrates the versatility and efficacy of the proposed CompGS across various scenes on the prevalent datasets [1, 3, 5]. Our method consistently achieves superior compression ratios compared to existing techniques [2, 4, 6–8], highlighting its potential for real-world applications.

Table 1: Per-scene Results on the Tanks&Templates dataset [5].

| Methods               | Train     |      |       |           |
|-----------------------|-----------|------|-------|-----------|
|                       | PSNR (dB) | SSIM | LPIPS | Size (MB) |
| Kerbl et al. [4]      | 22.02     | 0.81 | 0.21  | 257.44    |
| Navaneet et al. [7]   | 21.63     | 0.80 | 0.22  | 27.54     |
| Niedermayr et al. [8] | 21.92     | 0.81 | 0.22  | 13.78     |
| Lee et al. [6]        | 21.69     | 0.80 | 0.24  | 37.38     |
| Girish et al. [2]     | 21.68     | 0.80 | 0.23  | 24.67     |
| Proposed              | 22.12     | 0.80 | 0.23  | 8.60      |
|                       | 21.82     | 0.80 | 0.24  | 6.72      |
|                       | 21.49     | 0.78 | 0.26  | 5.51      |
| Methods               | Truck     |      |       |           |
|                       | PSNR (dB) | SSIM | LPIPS | Size (MB) |
| Kerbl et al. [4]      | 25.41     | 0.88 | 0.15  | 611.31    |
| Navaneet et al. [7]   | 25.04     | 0.88 | 0.16  | 66.48     |
| Niedermayr et al. [8] | 25.24     | 0.88 | 0.15  | 21.51     |
| Lee et al. [6]        | 25.10     | 0.87 | 0.16  | 41.55     |
| Girish et al. [2]     | 25.10     | 0.87 | 0.17  | 42.46     |
| Proposed              | 25.28     | 0.87 | 0.18  | 10.61     |
|                       | 24.97     | 0.86 | 0.20  | 7.82      |
|                       | 24.72     | 0.85 | 0.21  | 6.27      |

Table 2: Per-scene Results on the Deep Blending dataset [3].

| Methods               | DrJohnson |      |       |           |
|-----------------------|-----------|------|-------|-----------|
|                       | PSNR (dB) | SSIM | LPIPS | Size (MB) |
| Kerbl et al. [4]      | 29.14     | 0.90 | 0.24  | 782.10    |
| Navaneet et al. [7]   | 29.34     | 0.90 | 0.25  | 85.10     |
| Niedermayr et al. [8] | 29.03     | 0.90 | 0.25  | 27.86     |
| Lee et al. [6]        | 29.26     | 0.90 | 0.25  | 48.11     |
| Girish et al. [2]     | 29.52     | 0.91 | 0.24  | 80.09     |
| Proposed              | 29.33     | 0.90 | 0.27  | 10.38     |
|                       | 29.21     | 0.90 | 0.27  | 8.21      |
|                       | 28.99     | 0.90 | 0.28  | 7.00      |
| Methods               | Playroom  |      |       |           |
|                       | PSNR (dB) | SSIM | LPIPS | Size (MB) |
| Kerbl et al. [4]      | 29.94     | 0.91 | 0.24  | 549.88    |
| Navaneet et al. [7]   | 30.43     | 0.91 | 0.24  | 59.82     |
| Niedermayr et al. [8] | 29.86     | 0.91 | 0.25  | 19.88     |
| Lee et al. [6]        | 30.38     | 0.91 | 0.25  | 38.17     |
| Girish et al. [2]     | 30.27     | 0.91 | 0.25  | 43.28     |
| Proposed              | 30.04     | 0.90 | 0.29  | 7.15      |
|                       | 29.59     | 0.89 | 0.30  | 5.43      |
|                       | 29.61     | 0.89 | 0.31  | 5.06      |

REFERENCES

[1] Jonathan T Barron, Ben Mildenhall, Dor Verbin, Pratul P Srinivasan, and Peter Hedman. 2022. Mip-NeRF 360: Unbounded Anti-aliased Neural Radiance Fields. In *Proceedings of the IEEE/CVF Conference on Computer Vision and Pattern Recognition*. 5470–5479.

[2] Sharath Girish, Kamal Gupta, and Abhinav Shrivastava. 2023. EAGLES: Efficient Accelerated 3D Gaussians with Lightweight Encodings. *arXiv preprint arXiv:2312.04564* (2023), 1–10.

[3] Peter Hedman, Julien Philip, True Price, Jan-Michael Frahm, George Drettakis, and Gabriel Brostow. 2018. Deep Blending for Free-viewpoint Image-based Rendering. *ACM Transactions on Graphics* 37, 6 (2018), 1–15.

[4] Bernhard Kerbl, Georgios Kopanas, Thomas Leimkühler, and George Drettakis. 2023. 3D Gaussian Splatting for Real-time Radiance Field Rendering. *ACM Transactions on Graphics* 42, 4 (2023), 1–14.

[5] Arno Knapitsch, Jaesik Park, Qian-Yi Zhou, and Vladlen Koltun. 2017. Tanks and Temples: Benchmarking large-scale scene reconstruction. *ACM Transactions on Graphics* 36, 4 (2017), 1–13.

[6] Joo Chan Lee, Daniel Rho, Xiangyu Sun, Jong Hwan Ko, and Eunbyung Park. 2023. Compact 3D Gaussian Representation for Radiance Field. *arXiv preprint arXiv:2311.13681* (2023), 1–10.

[7] KL Navaneet, Kossar Pourahmadi Meibodi, Soroush Abbasi Koohpayegani, and Hamed Pirsiavash. 2023. Compact3D: Compressing Gaussian Splat Radiance Field Models with Vector Quantization. *arXiv preprint arXiv:2311.18159* (2023), 1–12.

[8] Simon Niedermayr, Josef Stumpfegger, and Rüdiger Westermann. 2023. Compressed 3D Gaussian Splatting for Accelerated Novel View Synthesis. *arXiv preprint arXiv:2401.02436* (2023), 1–10.

**Table 3: Per-scene Results on the Mip-NeRF 360 dataset [1].**

| Methods               | Bicycle   |      |       |           | Flowers   |      |       |           | Garden    |      |       |           |
|-----------------------|-----------|------|-------|-----------|-----------|------|-------|-----------|-----------|------|-------|-----------|
|                       | PSNR (dB) | SSIM | LPIPS | Size (MB) | PSNR (dB) | SSIM | LPIPS | Size (MB) | PSNR (dB) | SSIM | LPIPS | Size (MB) |
| Kerbl et al. [4]      | 25.18     | 0.77 | 0.21  | 1431.12   | 21.55     | 0.61 | 0.34  | 858.08    | 27.39     | 0.87 | 0.11  | 1383.79   |
| Navaneet et al. [7]   | 24.99     | 0.76 | 0.23  | 158.14    | 21.29     | 0.59 | 0.35  | 92.93     | 27.05     | 0.86 | 0.12  | 153.50    |
| Niedermayr et al. [8] | 24.99     | 0.75 | 0.23  | 46.77     | 21.27     | 0.59 | 0.35  | 31.19     | 26.98     | 0.85 | 0.14  | 46.63     |
| Lee et al. [6]        | 24.82     | 0.74 | 0.25  | 64.32     | 21.07     | 0.57 | 0.38  | 51.23     | 26.89     | 0.84 | 0.14  | 63.41     |
| Girish et al. [2]     | 24.80     | 0.74 | 0.25  | 102.32    | 21.11     | 0.58 | 0.37  | 63.83     | 26.81     | 0.84 | 0.15  | 76.21     |
| Proposed              | 24.70     | 0.74 | 0.26  | 21.74     | 21.31     | 0.58 | 0.35  | 25.44     | 27.45     | 0.85 | 0.13  | 28.66     |
|                       | 24.42     | 0.72 | 0.28  | 15.05     | 21.18     | 0.57 | 0.37  | 17.27     | 27.07     | 0.84 | 0.15  | 17.73     |
|                       | 24.21     | 0.71 | 0.30  | 12.30     | 20.97     | 0.55 | 0.39  | 12.85     | 26.74     | 0.83 | 0.17  | 15.41     |
|                       | Stump     |      |       |           | Tree Hill |      |       |           | Room      |      |       |           |
|                       | PSNR (dB) | SSIM | LPIPS | Size (MB) | PSNR (dB) | SSIM | LPIPS | Size (MB) | PSNR (dB) | SSIM | LPIPS | Size (MB) |
| Kerbl et al. [4]      | 26.56     | 0.77 | 0.22  | 1149.30   | 22.49     | 0.63 | 0.33  | 893.52    | 31.44     | 0.92 | 0.22  | 366.62    |
| Navaneet et al. [7]   | 26.53     | 0.77 | 0.23  | 126.12    | 22.50     | 0.63 | 0.34  | 97.24     | 31.05     | 0.91 | 0.23  | 39.01     |
| Niedermayr et al. [8] | 26.31     | 0.76 | 0.25  | 39.88     | 22.45     | 0.62 | 0.35  | 33.24     | 31.15     | 0.91 | 0.23  | 14.67     |
| Lee et al. [6]        | 26.28     | 0.76 | 0.26  | 56.63     | 22.59     | 0.63 | 0.34  | 61.29     | 30.76     | 0.91 | 0.23  | 34.26     |
| Girish et al. [2]     | 26.44     | 0.76 | 0.24  | 104.52    | 22.56     | 0.63 | 0.35  | 78.21     | 31.52     | 0.92 | 0.23  | 36.13     |
| Proposed              | 26.24     | 0.75 | 0.26  | 12.02     | 23.11     | 0.64 | 0.33  | 20.02     | 30.85     | 0.91 | 0.23  | 8.85      |
|                       | 26.05     | 0.74 | 0.28  | 8.23      | 23.05     | 0.64 | 0.35  | 12.63     | 30.14     | 0.90 | 0.25  | 6.76      |
|                       | 25.78     | 0.72 | 0.30  | 6.56      | 22.94     | 0.62 | 0.37  | 10.23     | 29.88     | 0.89 | 0.26  | 5.58      |
|                       | Counter   |      |       |           | Kitchen   |      |       |           | Bonsai    |      |       |           |
|                       | PSNR (dB) | SSIM | LPIPS | Size (MB) | PSNR (dB) | SSIM | LPIPS | Size (MB) | PSNR (dB) | SSIM | LPIPS | Size (MB) |
| Kerbl et al. [4]      | 28.99     | 0.91 | 0.20  | 285.04    | 31.34     | 0.93 | 0.13  | 426.82    | 32.16     | 0.94 | 0.20  | 297.50    |
| Navaneet et al. [7]   | 28.24     | 0.90 | 0.22  | 30.48     | 30.53     | 0.92 | 0.14  | 45.82     | 31.21     | 0.93 | 0.22  | 31.65     |
| Niedermayr et al. [8] | 28.69     | 0.90 | 0.21  | 13.58     | 30.75     | 0.92 | 0.14  | 18.46     | 31.48     | 0.93 | 0.21  | 13.08     |
| Lee et al. [6]        | 28.60     | 0.90 | 0.22  | 34.49     | 30.50     | 0.92 | 0.14  | 45.36     | 31.92     | 0.93 | 0.22  | 35.40     |
| Girish et al. [2]     | 28.32     | 0.90 | 0.22  | 31.73     | 30.40     | 0.92 | 0.14  | 56.64     | 31.38     | 0.93 | 0.22  | 36.22     |
| Proposed              | 29.09     | 0.90 | 0.22  | 9.61      | 30.82     | 0.92 | 0.15  | 10.39     | 31.80     | 0.93 | 0.22  | 11.78     |
|                       | 28.40     | 0.89 | 0.24  | 6.96      | 30.00     | 0.90 | 0.16  | 6.88      | 30.76     | 0.92 | 0.24  | 7.63      |
|                       | 27.73     | 0.87 | 0.26  | 5.41      | 29.29     | 0.89 | 0.18  | 5.55      | 29.79     | 0.91 | 0.26  | 5.56      |
